# Supplementary material for: A promising metal–organic framework (MOF), MIL-96(Al), for CO2 separation under humid conditions
Source: Royal Society of Chemistry journal article supplement (doi:10.1039/c7ta09696h), 2017-12-18
Supplement: c7ta09696h1.pdf [file c7ta09696h1.pdf]

## Supplementary Information

### A promising Metal-Organic Framework (MOF), MIL-96(Al) for CO<sub>2</sub> separation under wet conditions

Virginie Benoit,<sup>a</sup> Nicolas Chanut,<sup>a</sup> Renjith S. Pillai,<sup>b</sup> Marvin Benzaqui,<sup>c,d</sup> Isabelle Beurroies,<sup>a</sup> Sabine Devautour-Vinot,<sup>b</sup> Christian Serre,<sup>c</sup> Nathalie Steunou,<sup>d</sup> Guillaume Maurin,<sup>b</sup> Philip L. Llewellyn<sup>\* a</sup>

<sup>a.</sup> *Aix-Marseille Univ, CNRS, MADIREL, Marseille, France.*

<sup>b.</sup> *Institut Charles Gerhardt Montpellier, Université de Montpellier, CNRS, ENSCM, Place E. Bataillon, 34095 Montpellier cedex 05, France.*

<sup>c.</sup> *PSL Res Univ, FRE CNRS 2000, Ecole Super Phys & Chim Ind Paris, Ecole Normale Super, Inst Mat Poreux Paris, 75005 Paris, France.*

<sup>d.</sup> *Institut Lavoisier de Versailles, UMR CNRS 8180, Université de Versailles St Quentin en Yvelines, Université Paris Saclay, 45 avenue des Etats-Unis 78035 Versailles Cedex. France.*

## 1. Molecular simulations details.

**Table S1.** LJ potential parameters for all atoms of the MIL-96(Al).

| Atomic type | UFF          |                         |
|-------------|--------------|-------------------------|
|             | $\sigma$ (Å) | $\varepsilon / k_B$ (K) |
| Al          | 4.399        | 0.000                   |
| C           | 3.431        | 52.841                  |
| H           | 2.571        | 22.143                  |
| N           | 3.261        | 34.724                  |
| O           | 3.118        | 30.195                  |

**Table S2.** Potential parameters and partial charges for the guests

| Atomic type         | $\sigma$ (Å) | $\varepsilon / k_B$ (K) | $q$ (e) |
|---------------------|--------------|-------------------------|---------|
| O_e                 | 3.1589       | 93.200                  | 0.0000  |
| H_e                 | 0.00         | 0.000                   | 0.5564  |
| M_e                 | 0.00         | 0.000                   | -1.1128 |
| CH <sub>4</sub>     | 3.730        | 148.000                 | 0.0000  |
| N <sub>2</sub> _N   | 3.310        | 36.000                  | -0.4820 |
| N <sub>2</sub> _COM | 0.00         | 0.000                   | 0.9640  |
| CO <sub>2</sub> _C  | 2.757        | 28.129                  | 0.6512  |
| CO <sub>2</sub> _O  | 3.033        | 80.507                  | -0.3256 |

## 2. Computational predictions

### 2.1. Single component H<sub>2</sub>O, CO<sub>2</sub> and N<sub>2</sub> adsorption

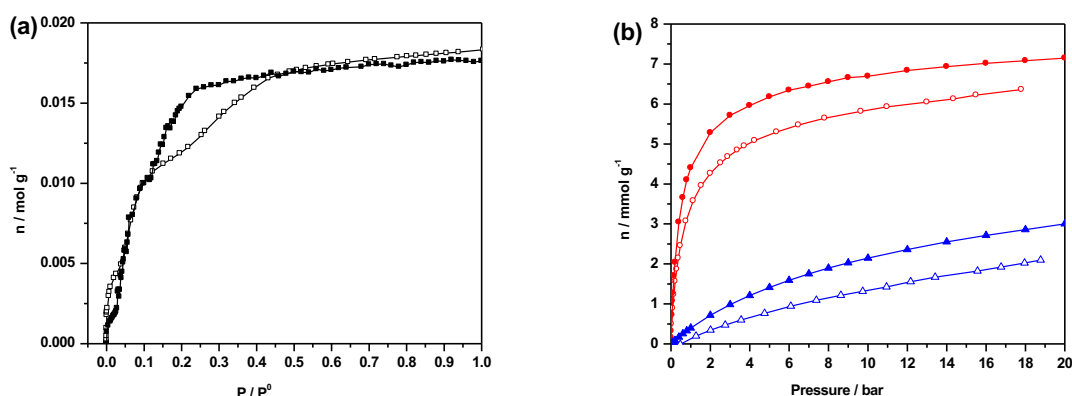

**Figure S1.** Comparison of the single component simulated (full symbols) and experimental (empty symbols) adsorption isotherms in MIL-96(Al) for H<sub>2</sub>O (squares) at 298K (a) and CO<sub>2</sub> (squares) and N<sub>2</sub> (circles) at 303 K (b).

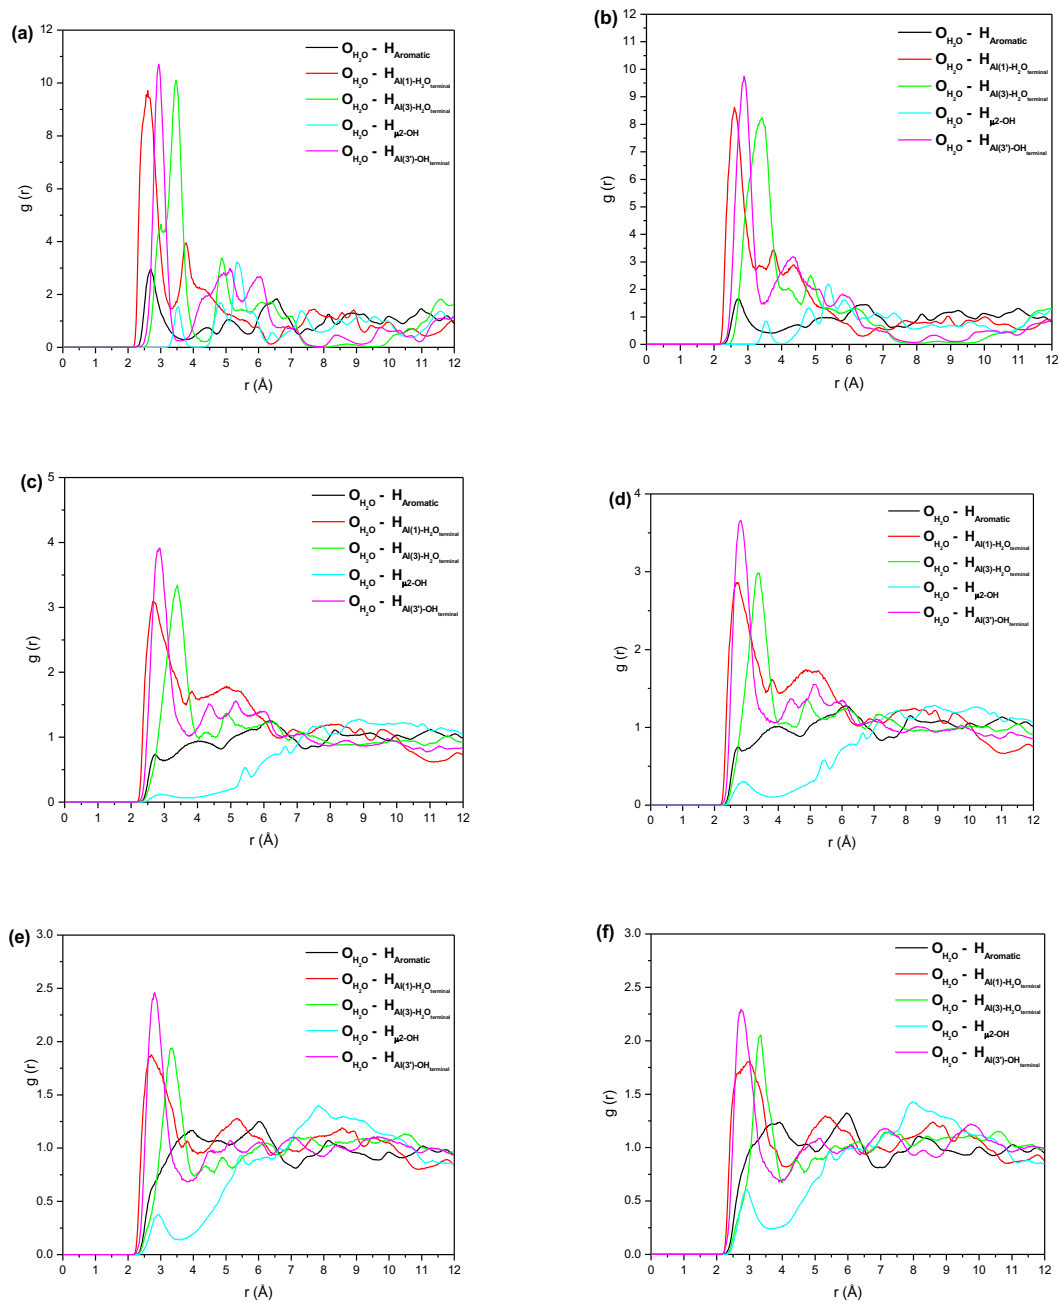

**Figure S2:** Radial Distribution Functions (RDF) between the oxygen atom of water ( $O_{H_2O}$ ) and all atoms of the MOF framework extracted from the GCMC simulations at 298 K in MIL-96(Al) at  $p/p^\circ$ , 0.001 (a), 0.01(b), 0.05(c), 0.1 (d), 0.22 (e), and 1.0 (f).

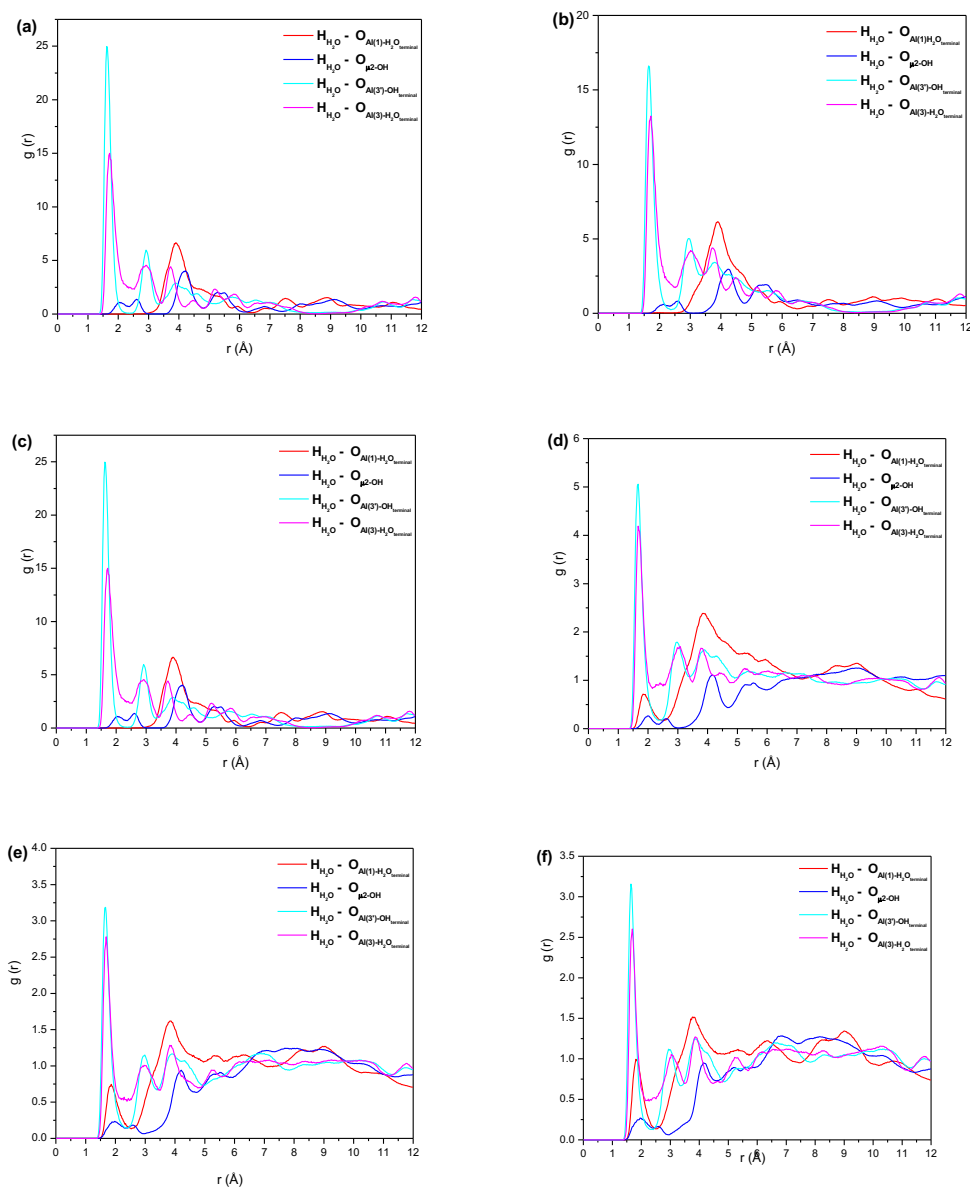

**Figure S3:** Radial Distribution Functions (RDF) between the hydrogen atom of water ( $\text{H}_{2\text{O}}$ ) that extracted from the GCMC simulations at 298 K in MIL-96(Al) at  $p/p^\circ$ , 0.001 (a), 0.01(b), 0.05(c), 0.1 (d), 0.22 (e), and 1.0 (f).

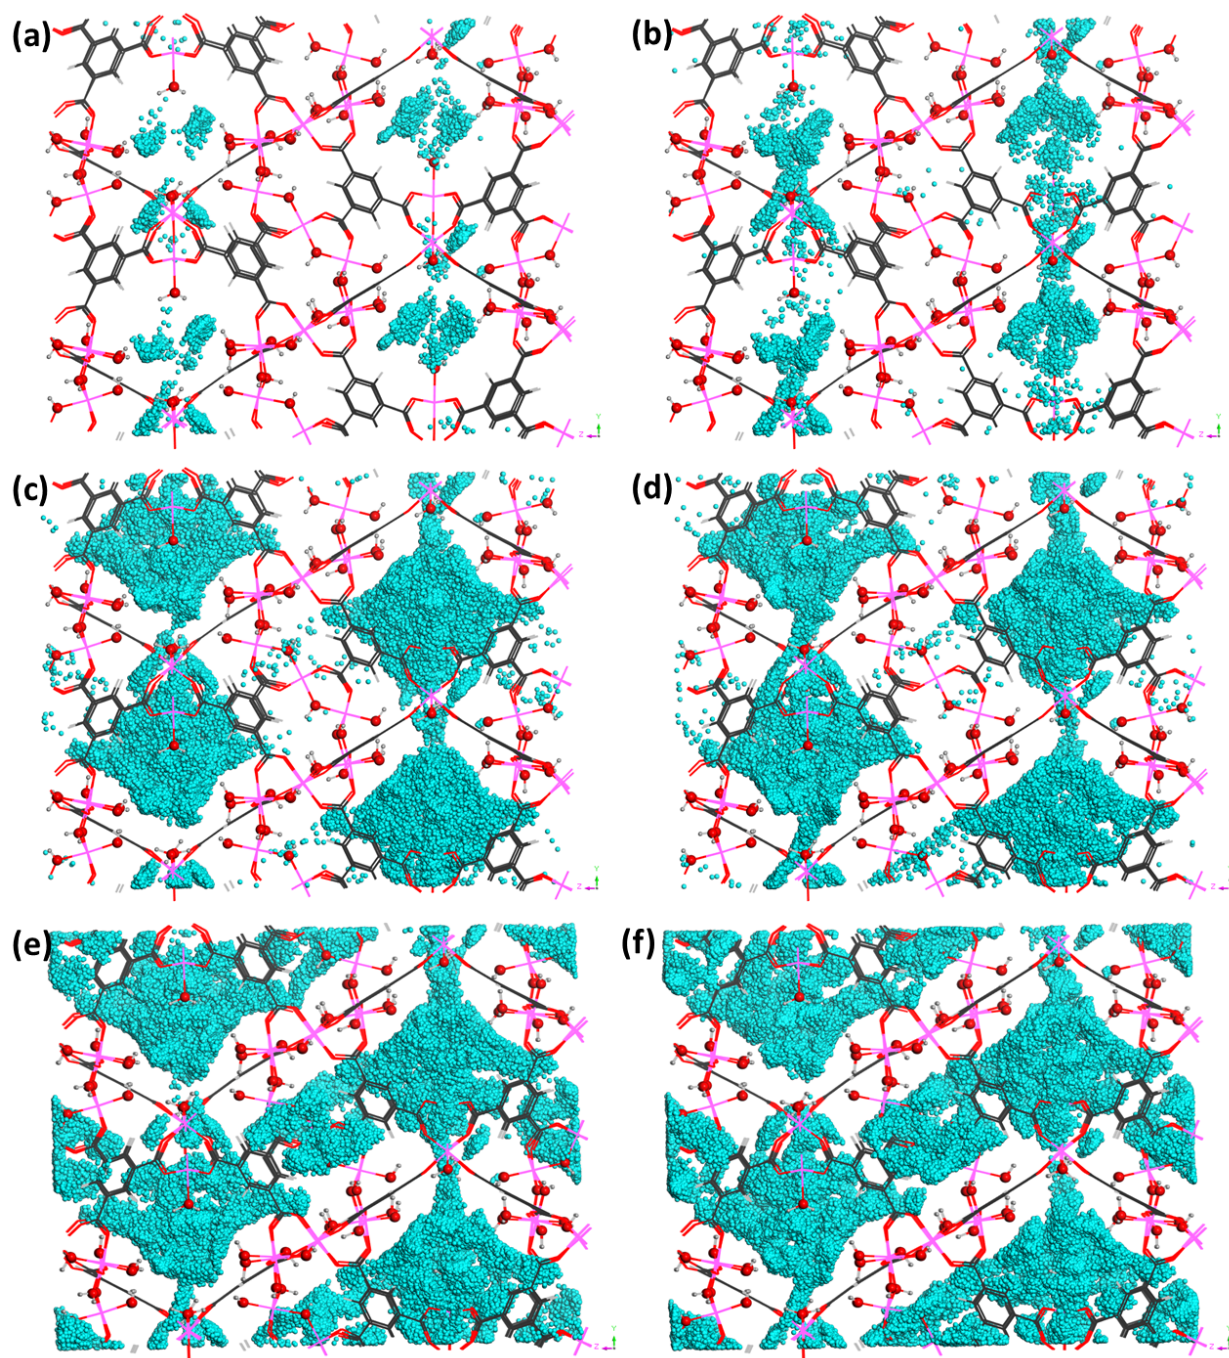

**Figure S4:** Maps of the occupied positions of  $H_2O$  (cyan) in 1000 equilibrated frames that extracted from the GCMC simulations at 298 K for MIL-96(Al) at  $p/p^\circ$ , 0.001 (a), 0.01(b), 0.05(c), 0.1 (d), 0.12 (e), and 0.22 (f).

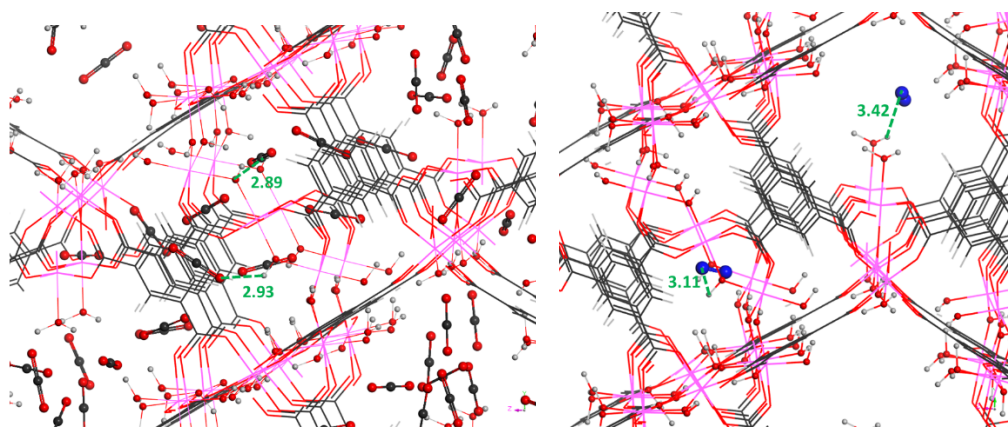

**Figure S5.** Local views of GCMC simulated arrangements of CO<sub>2</sub> (a) and N<sub>2</sub> (b) molecules in MIL-96(Al) at 303 K and 0.1 bar.

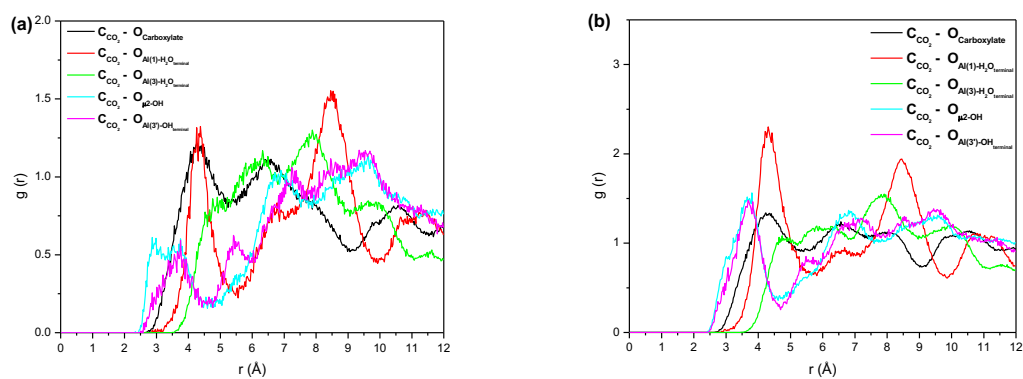

**Figure S6:** Radial Distribution Functions (RDF) between the Carbon of CO<sub>2</sub> ( $C_{CO_2}$ ) and all atoms of the MOF framework extracted from the GCMC simulations at 303 K in MIL-96(Al) at 0.01 bar (a) and 1.0 (b).

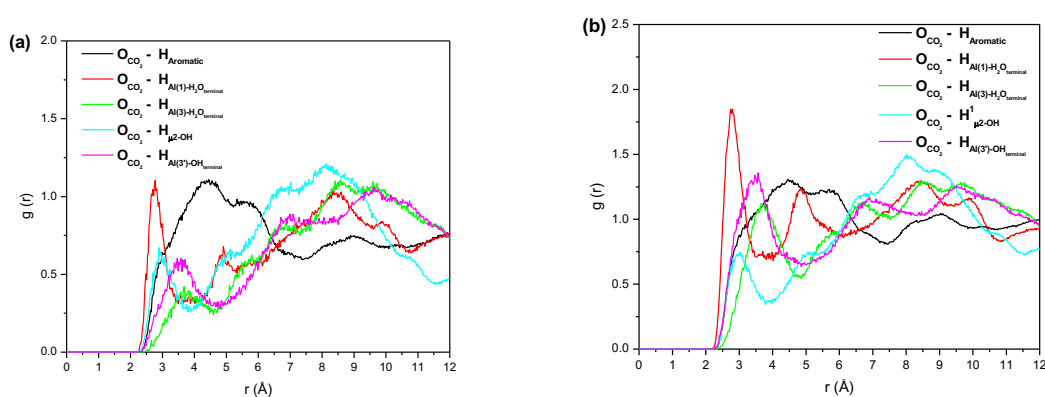

**Figure S7:** Radial Distribution Functions (RDF) between the oxygen in CO<sub>2</sub> ( $O_{CO_2}$ ) and all atoms of the MOF framework extracted from the GCMC simulations at 303 K in MIL-96(Al) at 0.01 bar (a) and 1.0 (b).

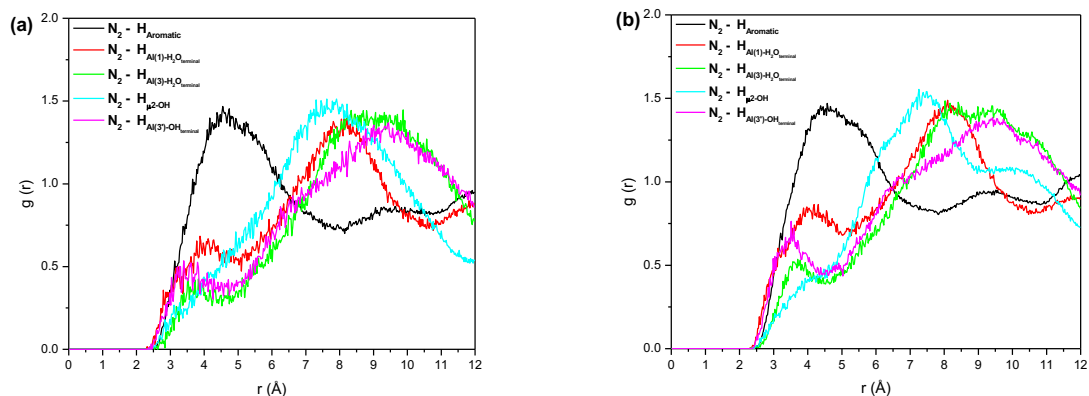

**Figure S8:** Radial Distribution Functions (RDF) between  $N_2$  and all atoms of the MOF framework that extracted from the GCMC simulations at 303 K in MIL-96(Al) at 0.01 bar (a) and 1.0 (b).

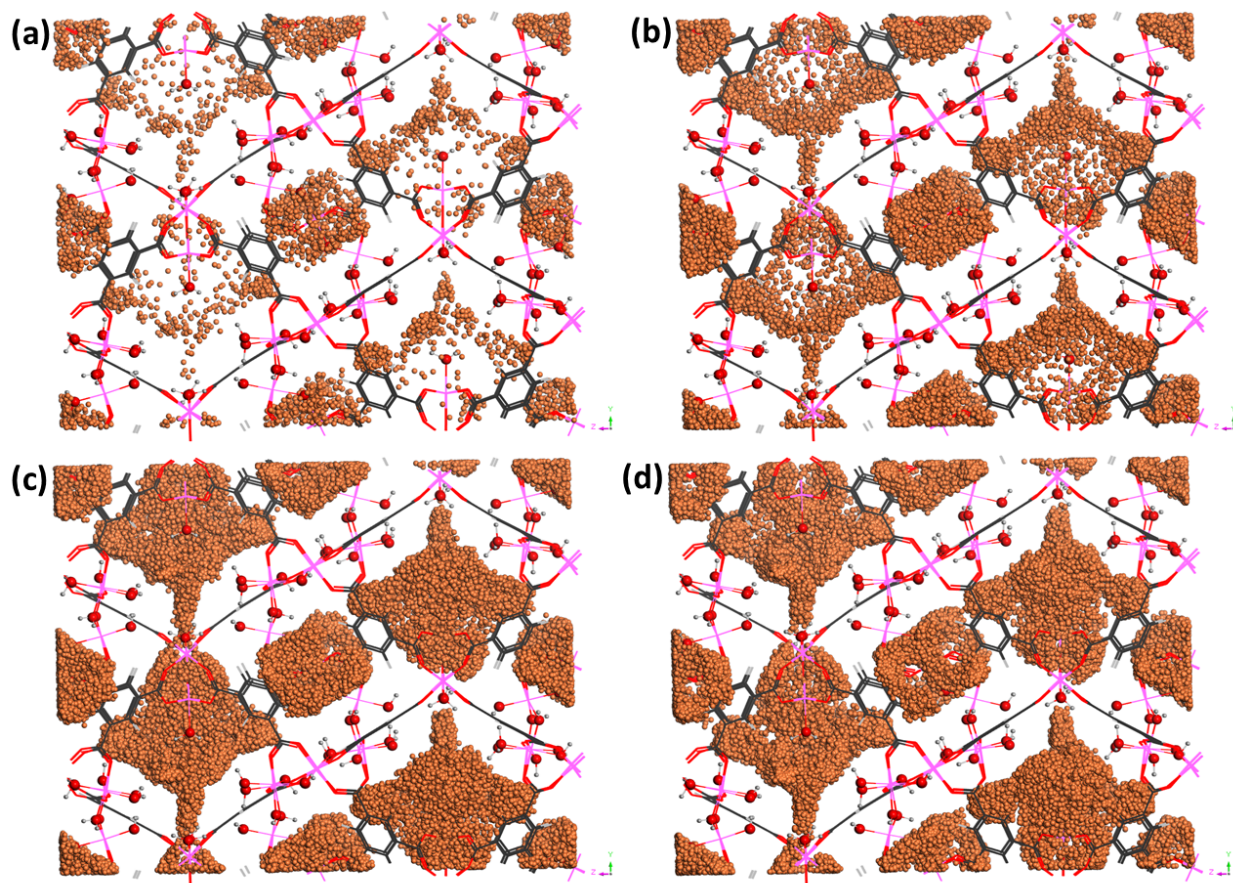

**Figure S9:** Maps of the occupied positions of  $CO_2$  (orange) in 1000 equilibrated frames extracted from the GCMC simulations at 303 K for MIL-96(Al) at pressures: 0.01 bar (a), 0.1 bar (b), 1.0 bar (c), and 10.0 bar (d).

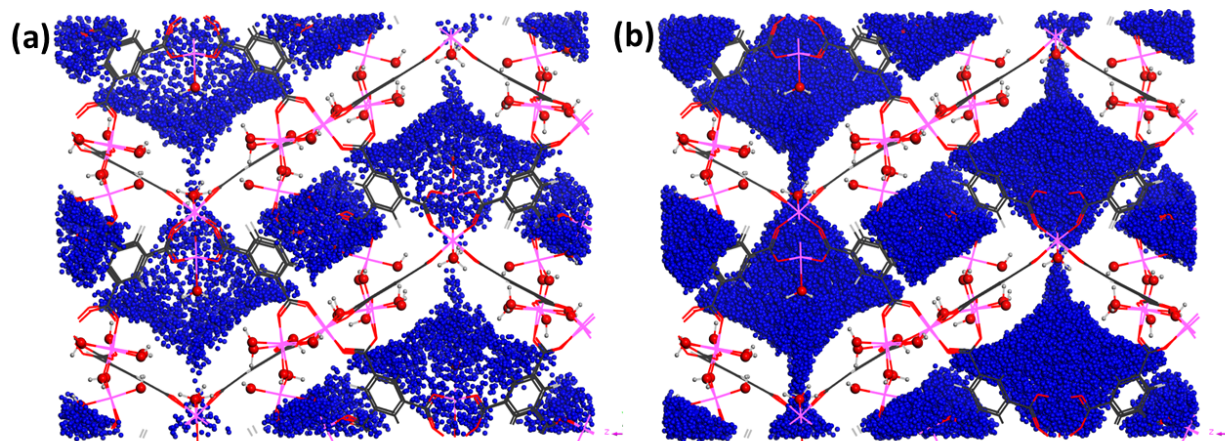

**Figure S10:** Maps of the occupied positions of N<sub>2</sub> (blue) in 1000 equilibrated frames extracted from the GCMC simulations at 303 K for MIL-96(Al) at pressures: 0.01 bar (a) and 10.0 (b).

## 2.2. Separation of CO<sub>2</sub>/N<sub>2</sub> mixtures in presence and absence of humidity

In separation processes, a good indication of the separation ability consists of estimating the selectivity of a porous material. The selectivity ( $S$ ) for CO<sub>2</sub> over N<sub>2</sub> is defined by the following expression:  $S(\text{CO}_2/\text{N}_2) = (x_{\text{CO}_2} / x_{\text{N}_2}) (y_{\text{N}_2} / y_{\text{CO}_2})$  where  $x_{\text{CO}_2}$  and  $x_{\text{N}_2}$  are the mole fractions of CO<sub>2</sub> and N<sub>2</sub> in the adsorbed phase, respectively, while  $y_{\text{CO}_2}$  and  $y_{\text{N}_2}$  are the mole fractions of CO<sub>2</sub> and N<sub>2</sub> in the bulk gas phase, respectively. The calculated selectivities for both CO<sub>2</sub>/N<sub>2</sub> (molar ratio =20/80) are shown in Figure S12 as a function of the bulk pressure.

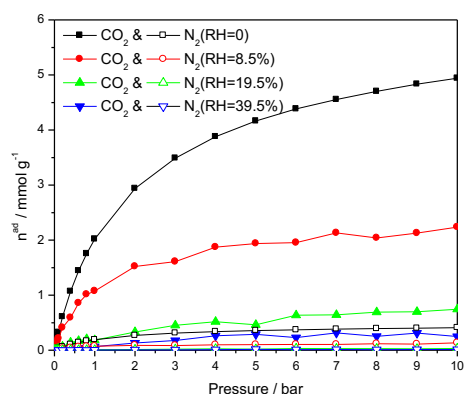

**Figure S11.** Simulated co-adsorption isotherm for CO<sub>2</sub> (closed symbols) and N<sub>2</sub> (open symbols) from their 20/80 molar ratio of binary gas mixture in presence of humidity, 0 % (square), 8.5% (circle), 19.5% (up-triangle) and 39.5% (down-triangle) as a function of the bulk pressure at 303 K.

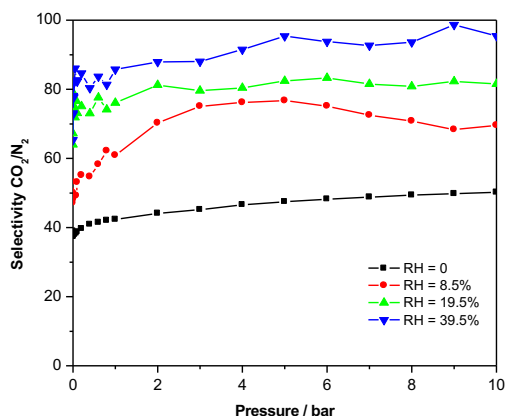

**Figure S12.** Simulated selectivities for CO<sub>2</sub>/N<sub>2</sub> from their 20/80 molar ratio gas mixture in MIL-96(Al) as a function of the bulk pressure at 303 K and in presence of humidity (RH = 0 % (square), 8.5 % (circle), 19.5 % (up-triangle) and 39.5 % (down-triangle)).

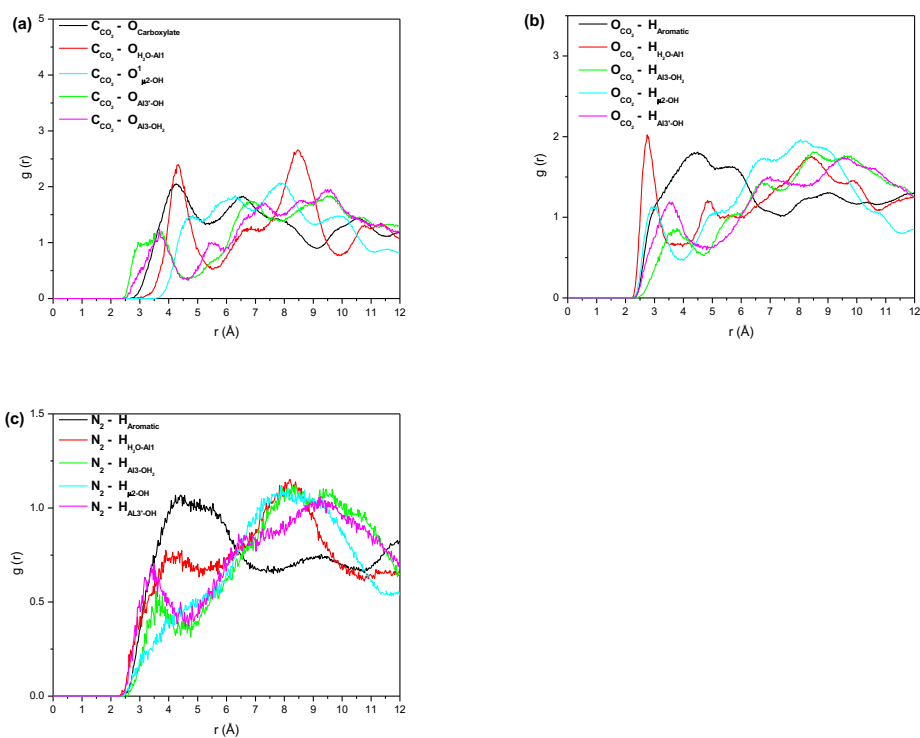

**Figure S13:** Radial Distribution Functions (RDF) between CO<sub>2</sub>, C<sub>CO2</sub> (a) and O<sub>CO2</sub> (b), and N<sub>2</sub> (c) and all atoms of the MOF extracted from the GCMC simulations for co-adsorption of CO<sub>2</sub>/N<sub>2</sub> = 20/80 in MIL-96(Al) at 303 K and 1.0 bar.

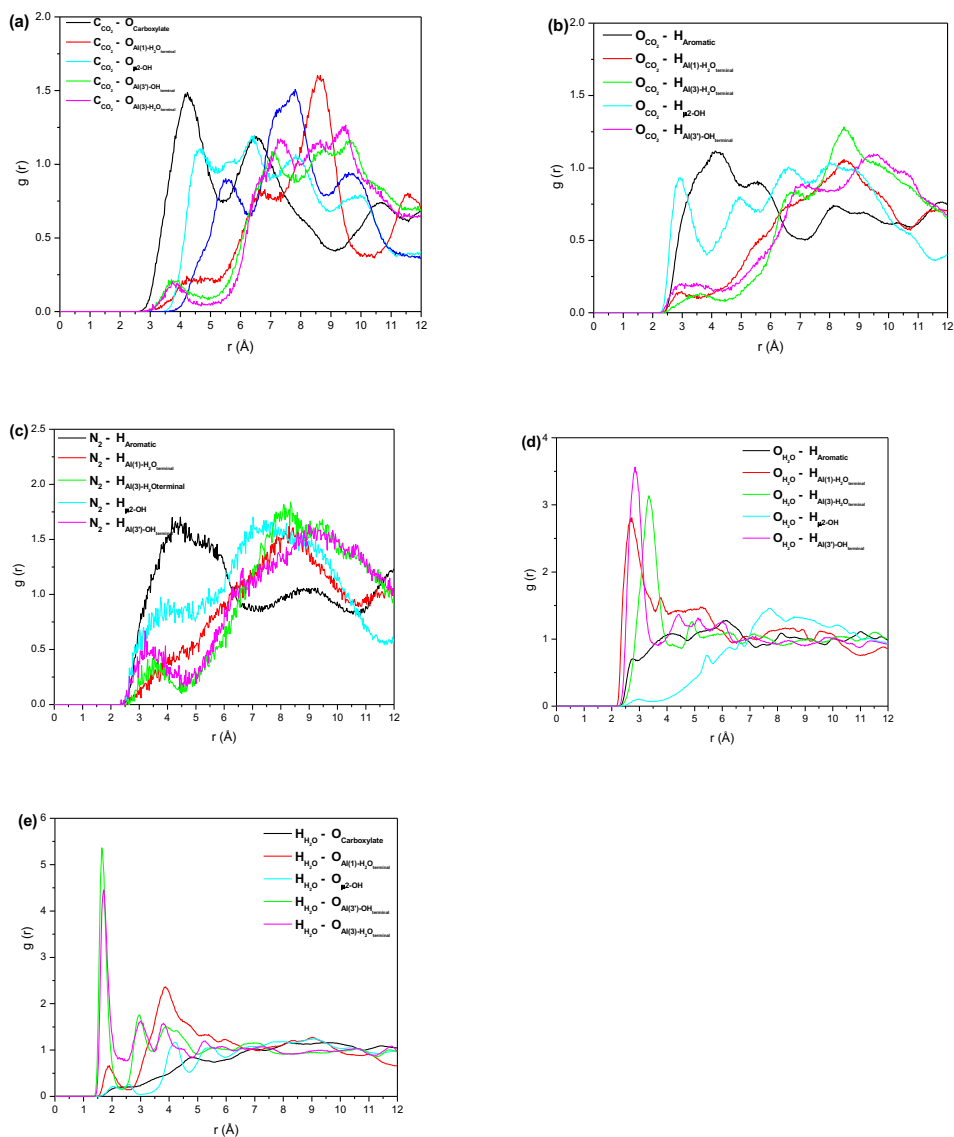

**Figure S14:** Radial Distribution Functions (RDF) between  $\text{CO}_2$ ,  $\text{CCO}_2$  (a) and  $\text{OCO}_2$  (b),  $\text{N}_2$  (c) and  $\text{H}_2\text{O}$ ,  $\text{O}_{\text{H}_2\text{O}}$  (d) and  $\text{H}_{\text{H}_2\text{O}}$  (e) and all atoms of the MOF framework extracted from the GCMC simulations for co-adsorption of  $\text{CO}_2/\text{N}_2 = 20/80$  in presence of humidity,  $\text{RH}=8.5\%$ , in MIL-96(Al) at 303 K and 1.0 bar.

### 3. Complementary sample characterization

#### 3.1 Textural parameters obtained from nitrogen physisorption at 77K

The accessible porosity of the MIL-96(Al) was probed by nitrogen gas adsorption at 77K using a Belsorb max apparatus. Prior to nitrogen adsorption, the MIL-96(Al) was outgassed at 150°C under secondary vacuum for 15h. From nitrogen adsorption isotherm at 77K, textural parameters were calculated such as apparent surface area, external surface and microporous volume.

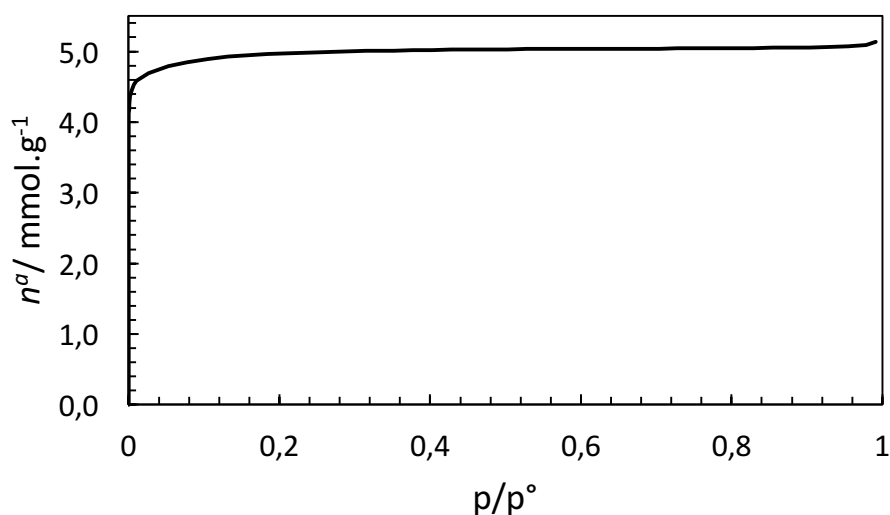

**Figure S15** – Nitrogen adsorption isotherm at 77K obtained on MIL-96(Al)

**Table S3.** Textural parameters obtained from N<sub>2</sub> adsorption at 77K on the MIL-96(Al) and showing its microporous character.

| MIL-96(Al) | S <sub>BET</sub> 'apparent'<br>(m <sup>2</sup> /g) | S <sub>EXT</sub> (m <sup>2</sup> /g) | V <sub>MICROPOROUS</sub> (cm <sup>3</sup> /g) |
|------------|----------------------------------------------------|--------------------------------------|-----------------------------------------------|
|            | 448                                                | 1.2                                  | 0.16                                          |

### 3.2 Water isotherm on MIL-96(Al) at 298K

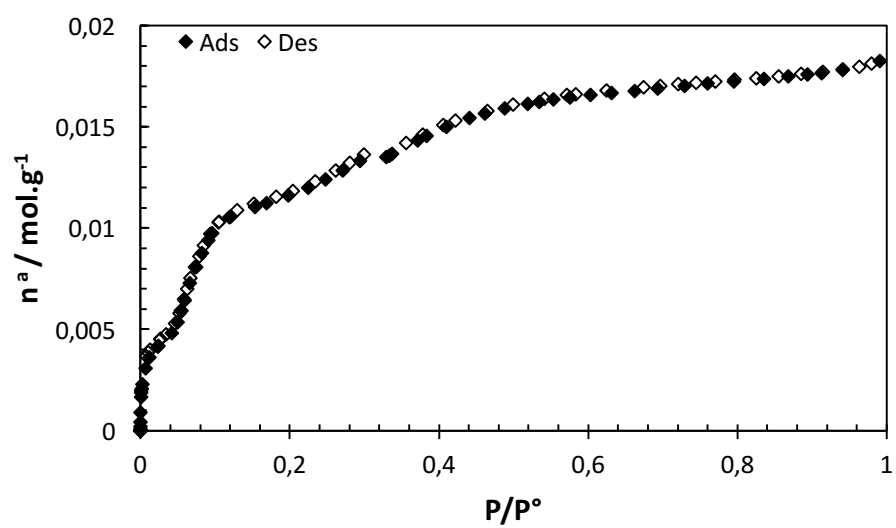

**Figure S16.** Water adsorption (fully lozenge) and desorption (empty lozenge) isotherms obtained at 298K on the MIL-96(Al)

#### 4. Complementary results concerning static adsorption experiments at 303K

##### 4.1. CO<sub>2</sub> adsorption isotherms and corresponding enthalpies of adsorption

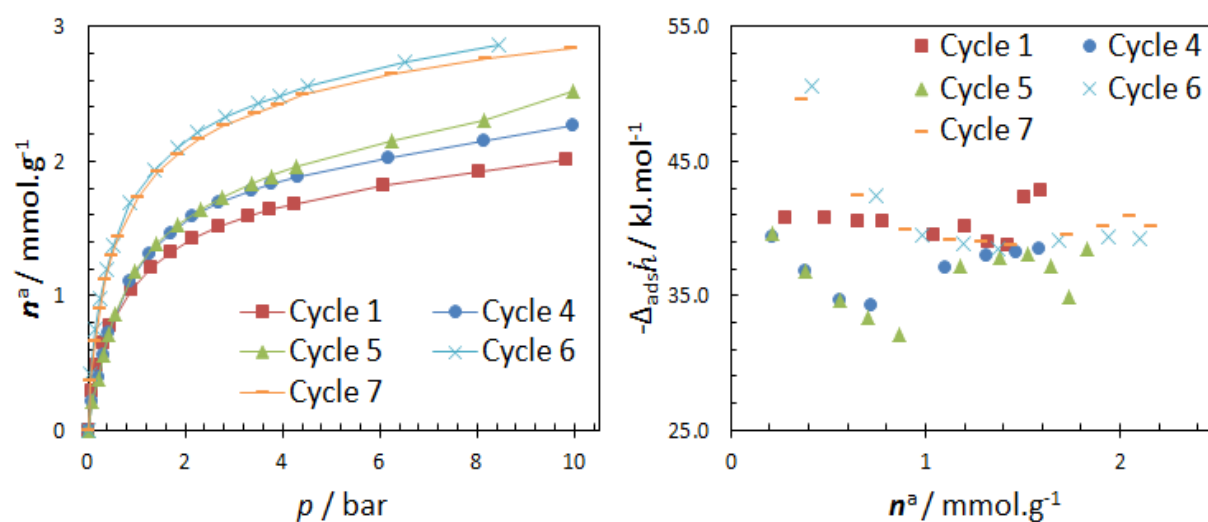

**Figure S17** – CO<sub>2</sub> adsorption isotherms (left) and adsorption enthalpy profiles (right) obtained from cycling on the pre-humidified MIL-96(Al)

**Table S4.** Henry's law constant calculated at low surface coverage for CO<sub>2</sub> adsorption cycles: 1, 4, 6 from the MIL-96(Al) pre-humidified state and compared to these obtained on the MIL-96(Al) outgassed.

| Cycle                                                    | 1    | 4    | 6     | Outgassed state |
|----------------------------------------------------------|------|------|-------|-----------------|
| $K_H - \text{CO}_2 / \text{mmol.bar}^{-1}.\text{g}^{-1}$ | 5.05 | 6.34 | 10.26 | 17              |

## 5. Dynamic measurements to measure CO<sub>2</sub> uptakes in the presence of controlled relative humidity

### 5.1 Experimental set-up

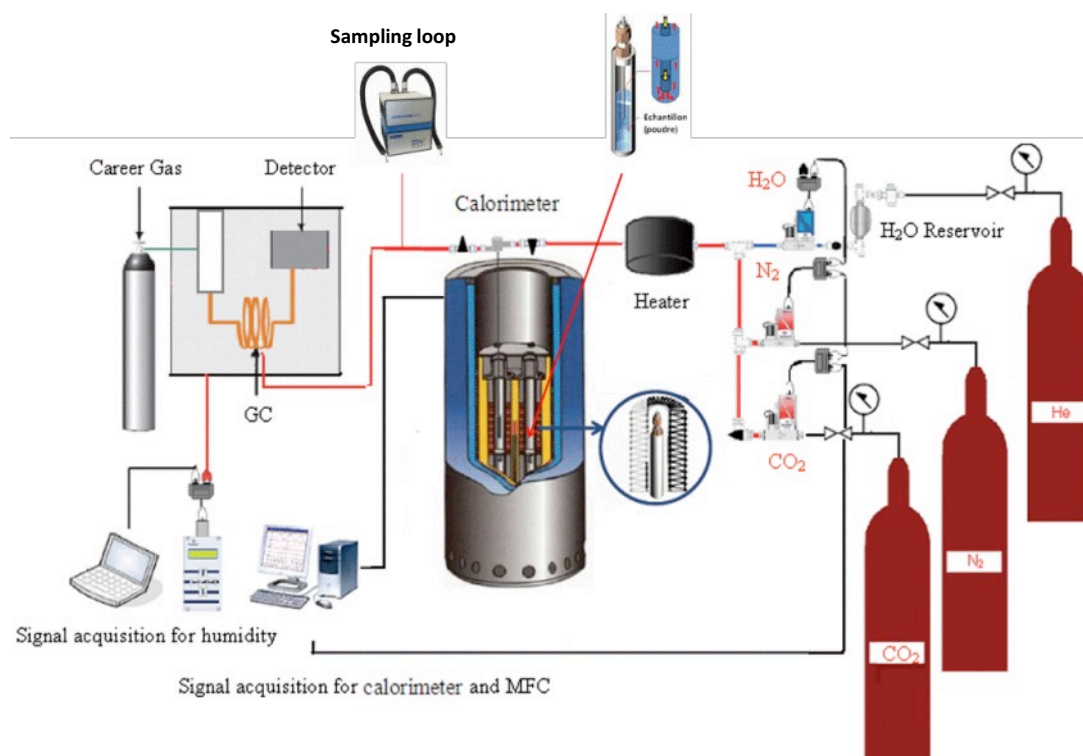

**Figure S18.** Schematic diagram of the flow adsorption microcalorimetry setup used to study the impact of water vapour during CO<sub>2</sub> adsorption on porous solids

Figure S18 shows a schematic diagram of the system used in our experiment: a Tian-Calvet type microcalorimeter and a gas chromatograph (GC6890N, Agilent) were coupled to simultaneously measure differential enthalpies of gas adsorption and CO<sub>2</sub> breakthrough curves. This rig was designed to operate in a dynamic mode at ambient temperature and at atmospheric pressure over a wide range of humidity. The system allowed 2 types of binary adsorption experiments (N<sub>2</sub>/CO<sub>2</sub>) either under dry conditions or under H<sub>2</sub>O vapour. A central manual valve allowed a switching of the system from the dry mode to the wet mode. The sample was pre-treated directly inside the sample cell under nitrogen flow at the selected temperature. After activation, the sample was kept under continuous N<sub>2</sub> flow until thermal equilibrium was achieved. Then, gases (N<sub>2</sub>, CO<sub>2</sub>) and/or water vapour were flowed into the system, the proportion of each gas in the mixture being controlled by using mass flow controllers (MFC). In order to obtain a homogeneous mixture of gas, the flow rate of carrier gas (N<sub>2</sub>) was 10 times larger than that of the adsorbate (CO<sub>2</sub>). The total flow rate was maintained at a constant rate of 30 mLn/min. This part of the system is housed inside a thermostated chamber to keep the temperature constant. If an interaction between the gas mixture and the sample occurs, an energetic response is observed and recorded by the thermopiles of the microcalorimeter. The outlet gas mixture concentration from the cell is

then analyzed by the thermal conductivity detector (TCD) of the GC. In order to improve the accuracy of the measurement, a sampling loop has been added to the system in the course of this work. Indeed, when the adsorption process is fast, the time for the GC to analyze the outlet composition of the flue gas is too long which limits the number of points recorded to plot the breakthrough curve and therefore the accuracy of the measurement is lowered. The sampling loop collects and stores a sample of the flue gas (until 16 samples) at any programmed time and these collected samples are analyzed later by the GC. Thus, even if the adsorption process is fast, a large number of points can be used to plot the breakthrough curve.

## 5.2 Experimental protocols for the dynamic measurements

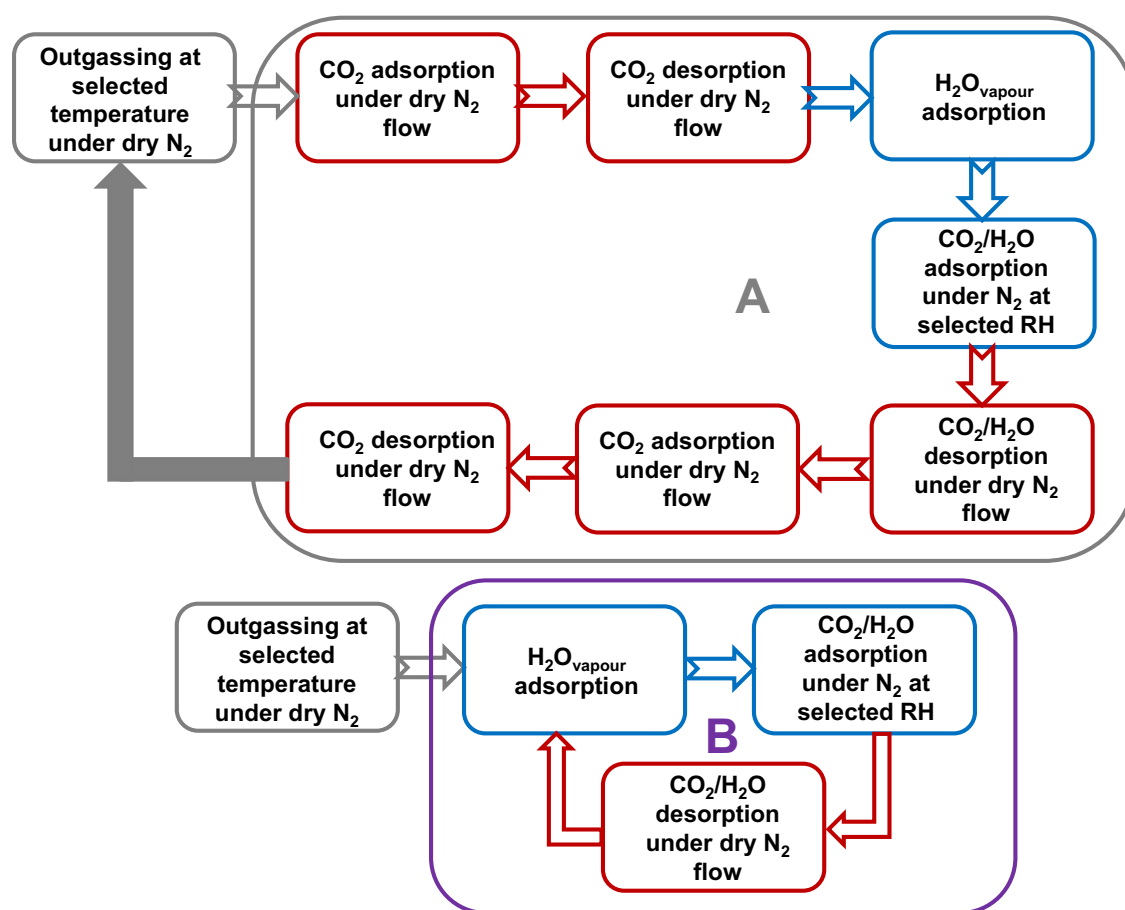

**Figure S19** - Schematic representation of the different protocols used to evaluate adsorbents for post-combustion CO<sub>2</sub> capture in wet conditions (A) and for cycling experiments in wet conditions (B). Red frames correspond to the step performed in the dry mode of the system while blue frames correspond to the step performed in the wet mode of the system.

### 5.3 Complementary results from the dynamic CO<sub>2</sub> adsorption experiments

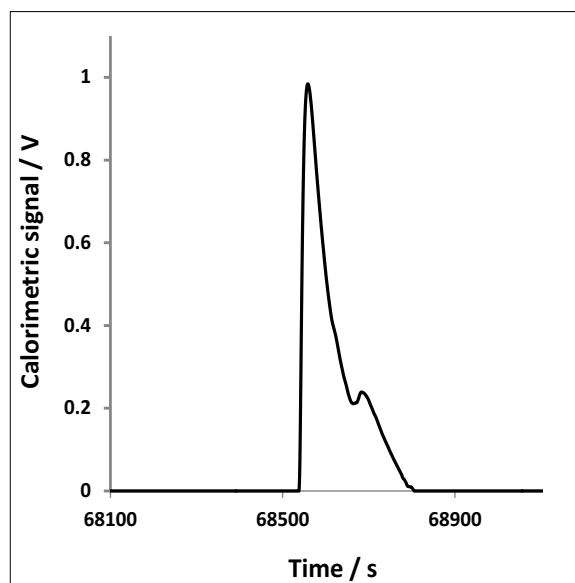

**Figure S20.** Unusual peak observed in the calorimetry signal which can be explained by the initial rapid (exothermic) adsorption of CO<sub>2</sub> followed by some H<sub>2</sub>O desorption (endothermic) giving the trough in the overall signal.

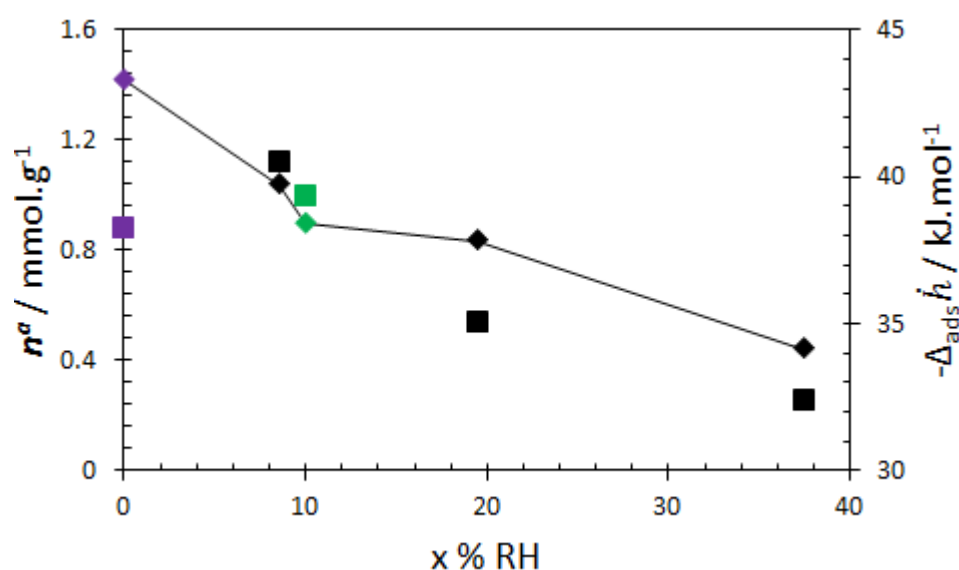

**Figure S21** – CO<sub>2</sub> amount adsorbed (lozenge) and adsorption enthalpies (square) as function of relative humidity rate obtained from dynamic mode: 10 %, 20%, and 40% (black). After CO<sub>2</sub> adsorption under moisture conditions the MIL-96(Al) was dried in order to perform a new CO<sub>2</sub> adsorption cycle and uptake and enthalpy obtained are represented by purple points. The green points correspond to CO<sub>2</sub> uptake and enthalpy got from static mode after seven adsorption cycles on the pre-humidified MIL-96(Al).

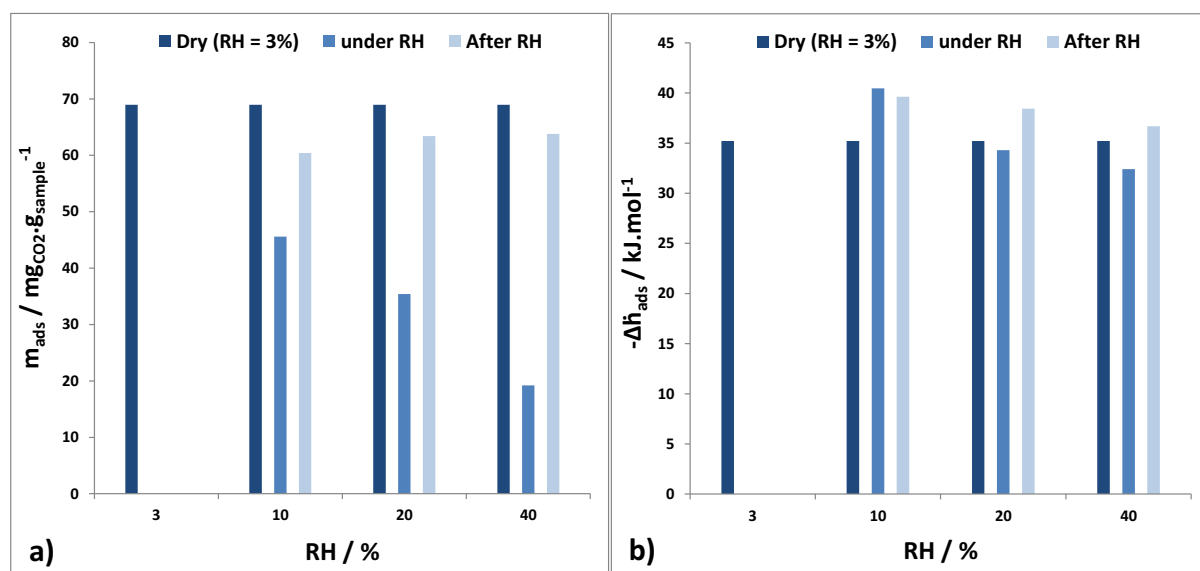

**Figure S22** - CO<sub>2</sub> uptake on the MIL-96(Al) under dry conditions (RH = 3%), under RH = 10, 20 and 40% and after exposure to water vapour and b) the corresponding enthalpies of adsorption.

## 6. Further comparisons between samples

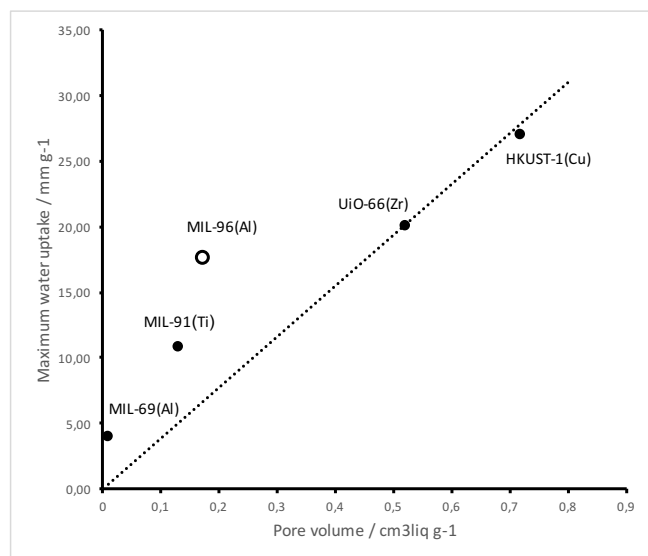

**Figure S23.** Correlation between maximum water uptake with respect to pore volume (calculated from N<sub>2</sub> physisorption at 77K) for several MOFs

**Table S5.** Henry's law constant calculated at low surface coverage for some MOFs having small pore size distribution.

| Sample                                                                     | MIL-69(Al) | MIL-91(Ti) | MIL-96(Al) | NH <sub>2</sub> -MIL-53(Al) | MIL-53(Al) |
|----------------------------------------------------------------------------|------------|------------|------------|-----------------------------|------------|
| Pore size distribution (Å)                                                 | 3.1        | 3.9        | 4          | 6                           | 8.5        |
| K <sub>H</sub> -H <sub>2</sub> O (mol.g <sup>-1</sup> .bar <sup>-1</sup> ) | 0.5        | 20.6       | 163        | 4.4                         | 0.1        |

**Table S6.** Comparison of the selectivities for CO<sub>2</sub> / N<sub>2</sub> and CO<sub>2</sub> / CH<sub>4</sub> (2) Obtained from the open literature

| Name                                                         | Mixture                         | %CO <sub>2</sub> in mixture | Selectivity | Calculation method | Ref |
|--------------------------------------------------------------|---------------------------------|-----------------------------|-------------|--------------------|-----|
| eea-MOF-4                                                    | CO <sub>2</sub> /N <sub>2</sub> | 10                          | 18          | IAST               | [1] |
| rtl-MOF-2                                                    | CO <sub>2</sub> /N <sub>2</sub> | 10                          | 38          | IAST               | [1] |
| SIFSIX-2Cu-i                                                 | CO <sub>2</sub> /N <sub>2</sub> | 10                          | 72          | Measurement        | [2] |
| Eu fcu-MOF                                                   | CO <sub>2</sub> /N <sub>2</sub> | 10                          | 82          | IAST               | [3] |
| SIFSIX-3-Cu                                                  | CO <sub>2</sub> /N <sub>2</sub> | 10                          | 15000       | IAST               | [4] |
| Zn <sub>4</sub> (pydc) <sub>4</sub> (DMF) <sub>2</sub> ·3DMF | CO <sub>2</sub> /N <sub>2</sub> | 15                          | 42          | IAST               | [5] |
| UiO-66 (Zr) BTEC                                             | CO <sub>2</sub> /N <sub>2</sub> | 15                          | 56          | Measurement        | [6] |
| Ni/DOBDC                                                     | CO <sub>2</sub> /N <sub>2</sub> | 15                          | 38          | Measurement        | [7] |
| USTA-16                                                      | CO <sub>2</sub> /N <sub>2</sub> | 15                          | 315         | Measurement        | [8] |
| MIL-91(Ti)                                                   | CO <sub>2</sub> /N <sub>2</sub> | 15                          | 150         | IAST               | [9] |

**Table S7.** Initial enthalpies of adsorption for CO<sub>2</sub> as a function of CO<sub>2</sub> uptake at low pressure, used to construct Figure 10.

| Sample                        | Experimental conditions<br>Temp/CO <sub>2</sub> partial pressure | CO <sub>2</sub> uptake | Enthalpy | Reference |
|-------------------------------|------------------------------------------------------------------|------------------------|----------|-----------|
| MOF-74-Mg                     | 296/ 0.1                                                         | 5.36                   | 47       | [10]      |
| MOF-74-Ni                     | 296/ 0.1                                                         | 2.74                   | 41       | [10]      |
| MOF-74-Co                     | 296/ 0.1                                                         | 2.66                   | 37       | [10]      |
| MOF-74-Zn                     | 296/ 0.1                                                         | 1.32                   | -        | [10]      |
| SIFSIX-3-Zn                   | 298/ 0.15                                                        | 2.43                   | 45       | [11]      |
| SIFSIX-2-Cu-i                 | 298/ 0.15                                                        | 2.3                    | 31.9     | [11]      |
| SIFSIX-2-Cu                   | 298/ 0.15                                                        | 0.36                   | 22       | [11]      |
| [Cu(bpy) <sub>2</sub> SiF6]   | 298/ 0.2                                                         | 1.1                    | -        | [12]      |
| [Cu(bpy-1) <sub>2</sub> SiF6] | 298/ 0.15                                                        | 0.84                   | 27       | [13]      |
| [Cu(bpy-2) <sub>2</sub> SiF6] | 298/ 0.15                                                        | 0.52                   | 21       | [13]      |
| UiO-66                        | 298/ 0.1                                                         | 0.67                   | 25.5     | [14]      |

- [1] Z. Chen, K. Adil, L. J. Weseliński, Y. Belmabkhouta, M. Eddaoudi, *J. Mater. Chem. A*, **2015**, 3, 6276-6281.
- [2] P. Nugent, Y. Belmabkhout, S. D. Burd, A. J. Cairns, R. Luebke, K. Forrest, T. Pham, S. Ma, B. Space, L. Wojtas, M. Eddaoudi, M.J. Zaworotko, *Nature*, **2013**, 495, 80–84.
- [3] D.-X. Xue, Y. Belmabkhout, O. Shekhah, H. Jiang, K. Adil, A. J. Cairns, M. Eddaoudi, *J. Amer. Chem. Soc.*, **2015**, 137, 5034-5040.
- [4] O. Shekhah, Y. Belmabkhout, Z. Chen, V. Guillerm, A. Cairns, K. Adil, M. Eddaoudi, *Nat. Comms.*, **2014**, 5, 4228.
- [5] S. R. Ahrenholtz, C. Landaverde-Alvarado, M. Whiting, S. Lin, C. Slebodnick, E. Marand, A. J. Morris, *Inorg. Chem.*, **2015**, 54(9), 4328-4336.
- [6] Q. Yang, S. Vaesen, F. Ragon, A. D. Wiersum, D. Wu, A. Lago, T. Devic, C. Martineau, F. Taulelle, P. L. Llewellyn, H. Jobic, C. Zhong, C. Serre, G. De Weireld, G. Maurin, *Angew. Chem. Int. Ed.*, **2013**, 52,
- [7] J. Liu, J. Tian, P. K. Thallapally, B. P. McGrail, *J. Phys. Chem. C*, **2012**, 116(17):9575 – 9581.
- [8] S. C. Xiang, Y. B. He, Z. J. Zhang, H. Wu, W. Zhou, R. Krishna and B. L. Chen, *Nat. Commun.*, **2012**, 3, 954.
- [9] V. Benoit, R. S. Pillai, A. Orsi, P. Normand, H. Jobic, F. Nouar, P. Billemonet, E. Bloch, S. Bourrelly, T. Devic, P. A. Wright, G. de Weireld, C. Serre, G. Maurin and P. L. Llewellyn, *J. Mater. Chem. A*, **2016**, 4, 1383–1389
- [10] S. R. Caskey, A. G. Wong-Foy, A. J. Matzger, *J. Amer. Chem. Soc.*, **2008**, 130, 33.
- [11] P. Nugent, Y. Belmabkhout, S. D. Burd, A. J. Cairns, R. Luebke, K. Forrest, T. Pham, S. Ma, B. Space, L. Wojtas, M. Eddaoudi, M. J. Zaworotko, *Nature*. **2013**, 495, 80-84.
- [12] K. A. Forrest, T. Pham, P. Nugent, S. D. Burd, A. Mullen, L. Wojtas, M. J. Zaworotko, B. Space, *Cryst. Growth Des.* **2013**, 13, 4542-4548.
- [13] S. D. Burd, S. Ma, J. A. Perman, B. J. Sikora, R. Q. Snurr, P. K. Thallapally, J. Tian, L. Wojtas, M. J. Zaworotko, *J. Amer. Chem. Soc.* **2012**, 134, 3663-3666.
- [14] Q. Wang, J. Bai, Z. Lu, Y. Pan, X. You, *Chem. Commun.* **2016**, 52, 443-452.
